# Supplementary material for: Enhanced detection and annotation of small molecules in metabolomics using molecular-network-oriented parameter optimization
Source: Royal Society of Chemistry journal article supplement (doi:10.1039/d1mo00005e), 2021-07-09
Supplement: d1mo00005e1.pdf [file d1mo00005e1.pdf]

**ENHANCED DETECTION AND ANNOTATION OF SMALL MOLECULES IN  
METABOLOMICS USING MOLECULAR NETWORK-ORIENTED PARAMETER  
OPTIMIZATION**

***SUPPORTING INFORMATION***

**Running title:** Parameter optimization for molecular network-based compound ID

<sup>1</sup>Rui Xu, <sup>1</sup>Jisun Lee, <sup>1</sup>Li Chen, <sup>1,2</sup>Jiangjiang Zhu<sup>#</sup>

**Author affiliations:**

<sup>1</sup>Human Nutrition Program, The Ohio State University, Columbus, Ohio 43210

<sup>2</sup>James Comprehensive Cancer Center, The Ohio State University, Columbus, Ohio 43210

**<sup>#</sup>To whom correspondence should be addressed to:**

Jiangjiang (Chris) Zhu, Ph.D., Comprehensive Cancer Center and Department of Human Sciences, The Ohio State University, 400 W 12th Ave, Columbus, OH 43210

Tel: 614-685-2226, Email: [zhu.2484@osu.edu](mailto:zhu.2484@osu.edu)

**Key words:** Metabolomics, molecular network, parameter optimization, mass spectrometry

**Grant Support:** Research reported in this publication was supported by the National Institute of General Medical Sciences of the National Institutes of Health under Award Number R35GM133510.

Figure S1. An example of molecular network and corresponding mass spectrum at m/z 449.101.

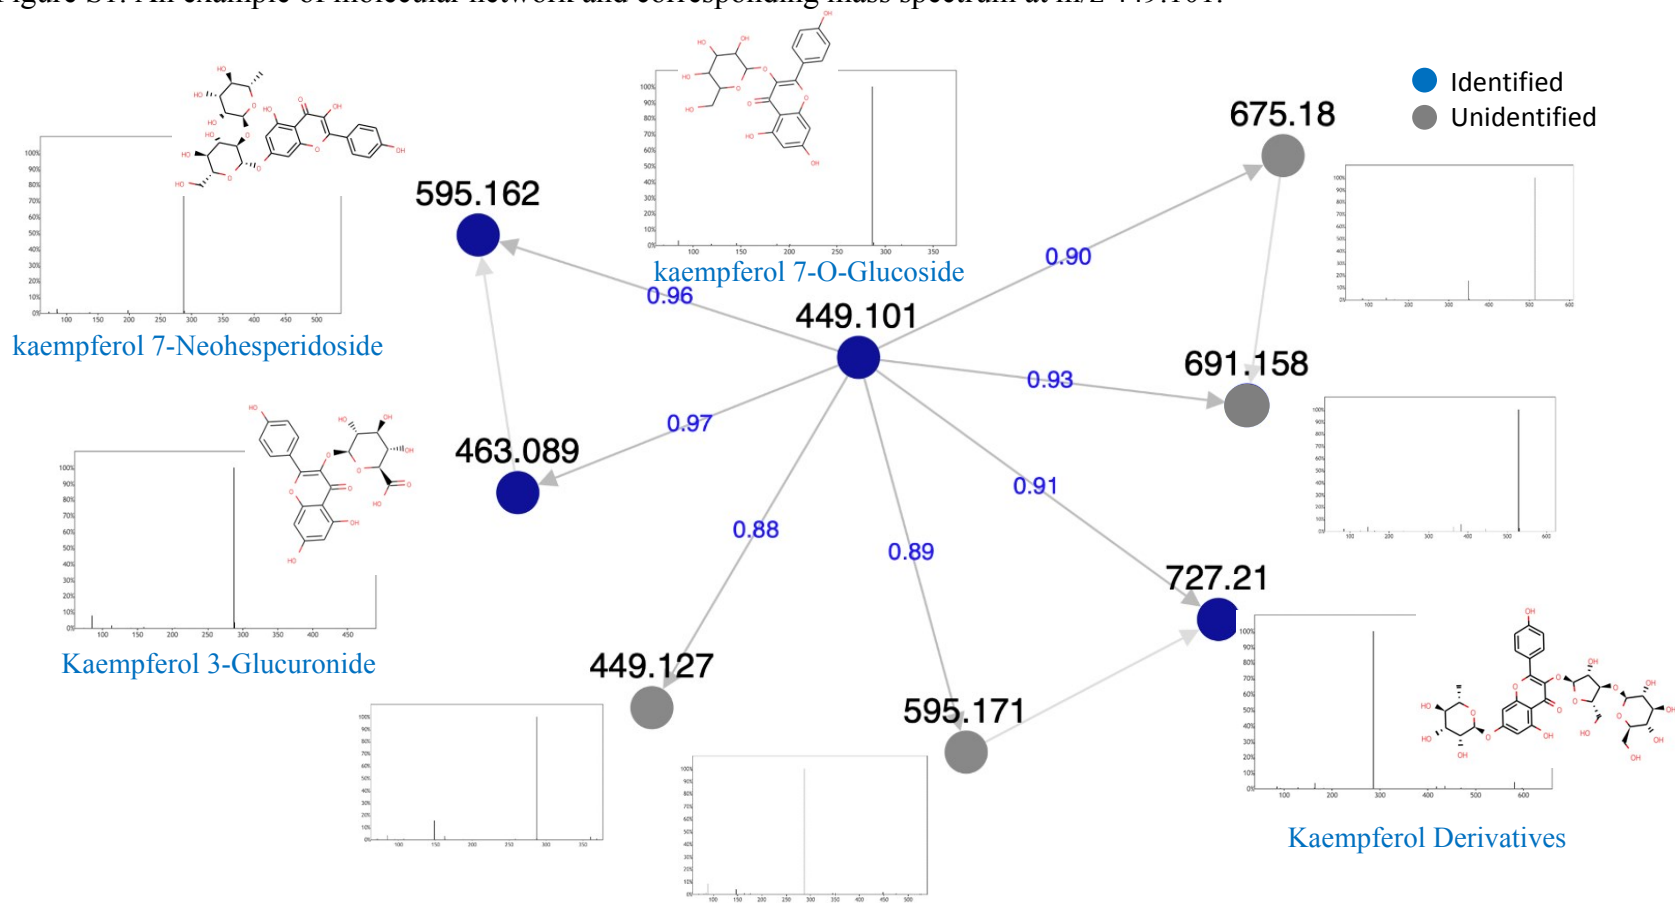

Figure S2. Average statistical values for molecular network with BRB Powder raw data generated under different resolution, NCE, intensity threshold, and exclusion time. TN: total nodes; IN: identified nodes; NN: nodes in network; SN: self-loop nodes; P/E: pairs/edges; CS: cosine scores; NW: networks; CC: cluster coefficients.

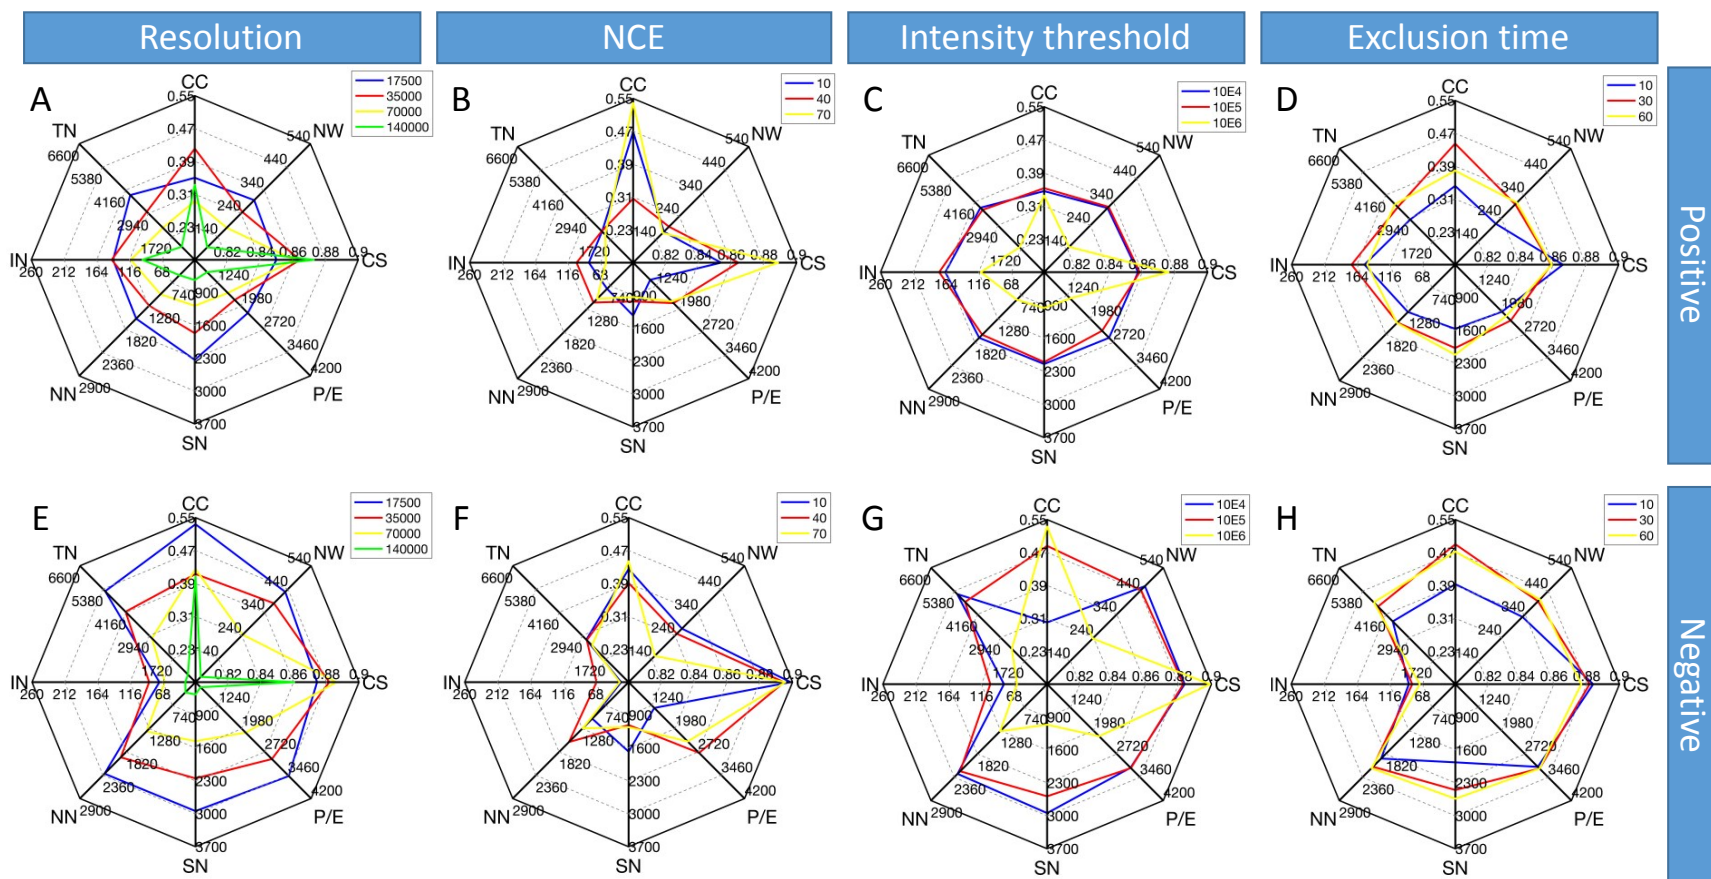

Figure S3. The intensity of the largest cluster of each MN under different parameter settings using powder BRB extract.

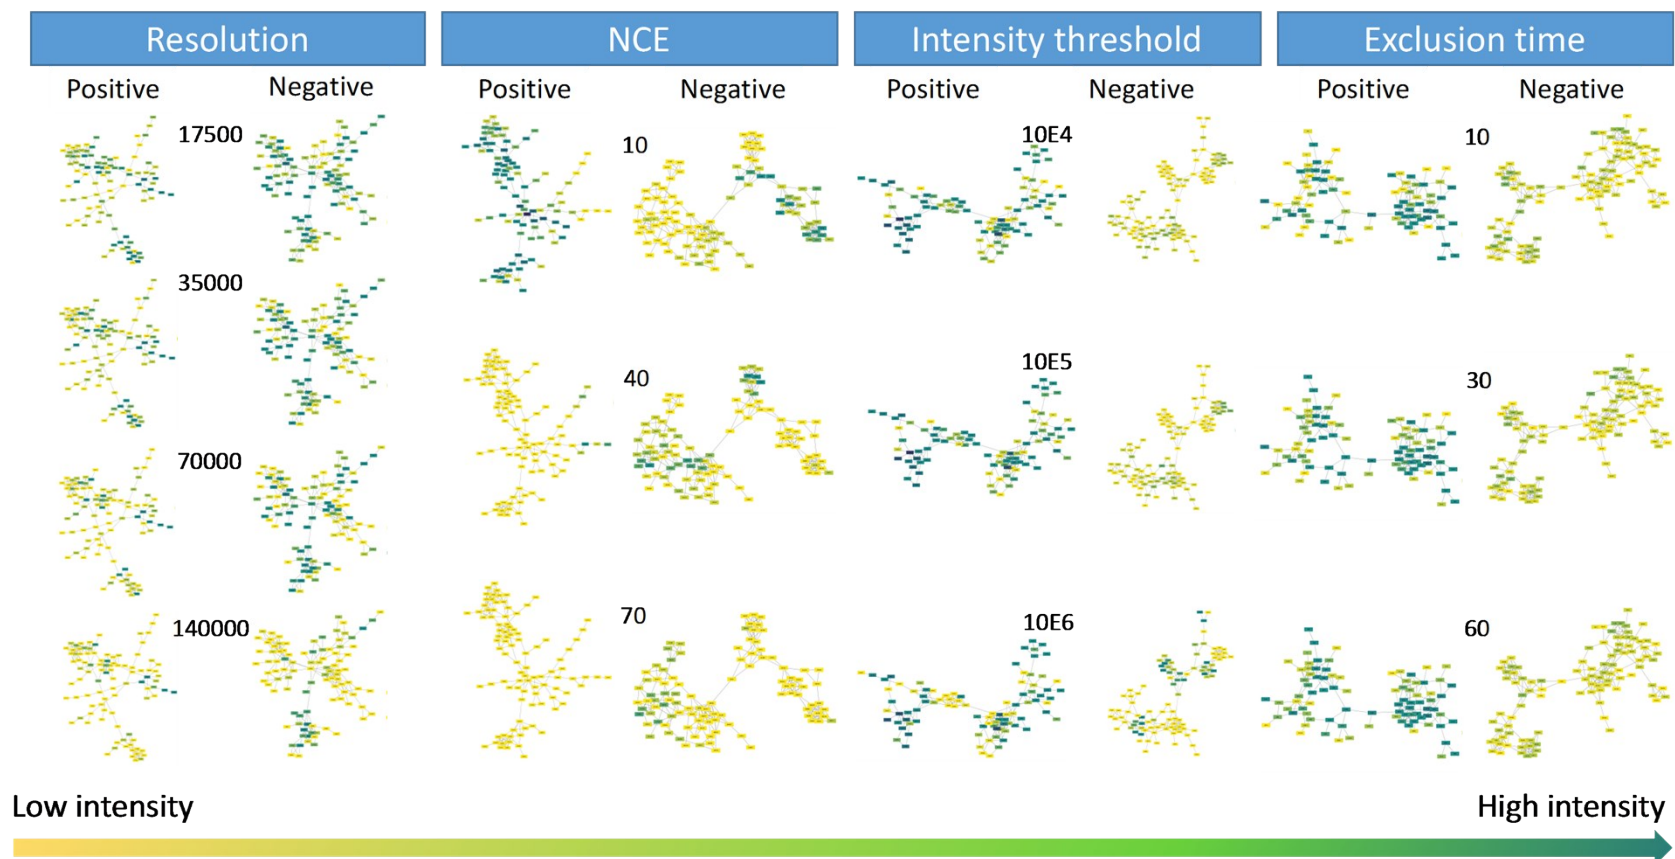

Figure S4. The node origins of the largest cluster of each MN under different parameter settings using powder BRB extract.

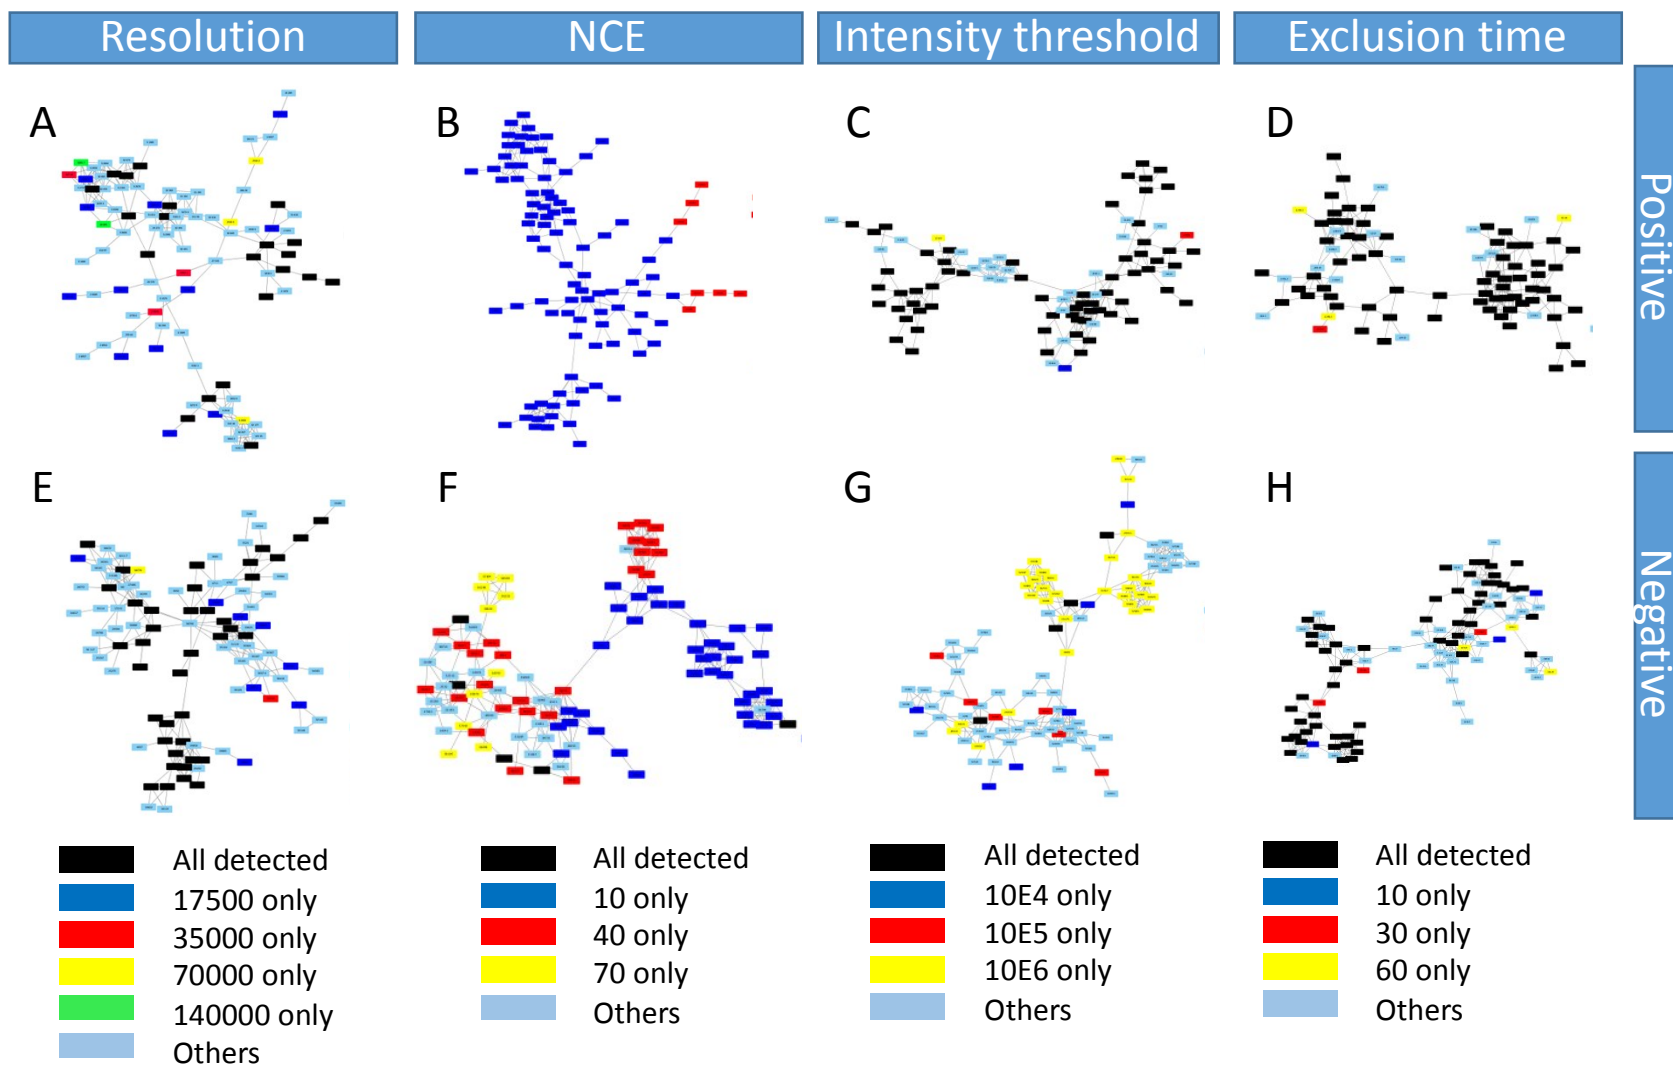

Figure S5. The node origins distribution of each MN under different parameter settings using powder BRB extract.

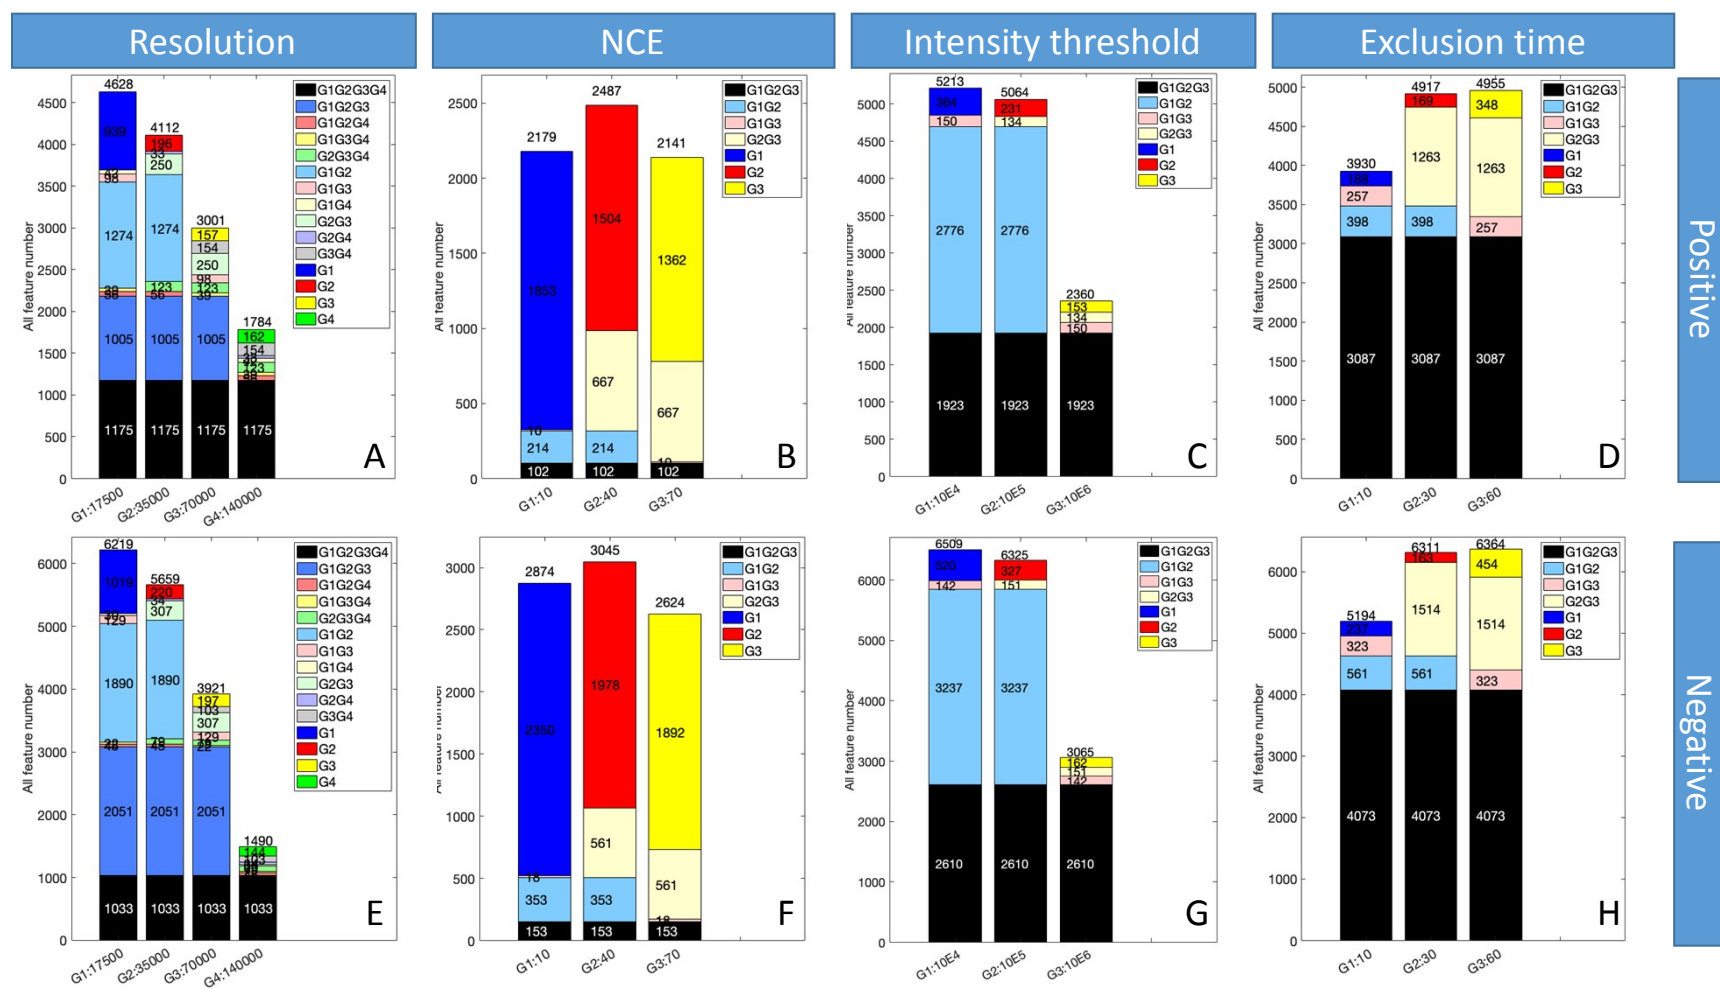

Figure S6. A. The annotated features under both polarities with both BRB samples.

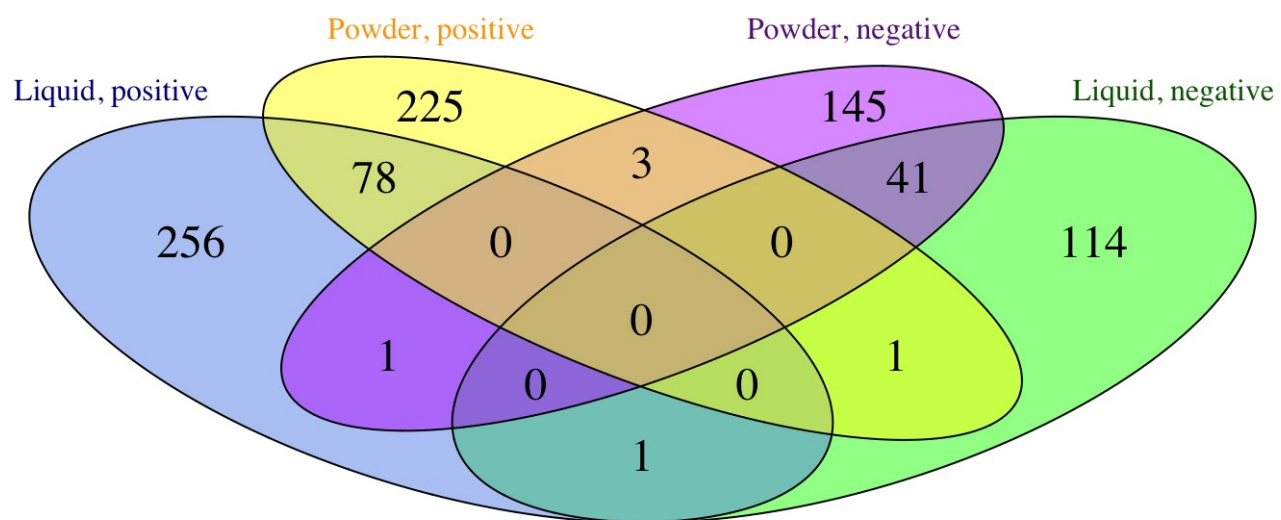

Table S1. A list of the different combinations of parameter settings for LC-MS experiments.

| No. | Resolution | NCE | Intensity threshold | Exclusion time |
|-----|------------|-----|---------------------|----------------|
| 1   | 17,500     | 10  | 1.00E+05            | 10             |
| 2   | 17,500     | 10  | 1.00E+05            | 30             |
| 3   | 17,500     | 10  | 1.00E+05            | 60             |
| 4   | 17,500     | 10  | 1.00E+06            | 10             |
| 5   | 17,500     | 10  | 1.00E+06            | 30             |
| 6   | 17,500     | 10  | 1.00E+06            | 60             |
| 7   | 17,500     | 10  | 1.00E+07            | 10             |
| 8   | 17,500     | 10  | 1.00E+07            | 30             |
| 9   | 17,500     | 10  | 1.00E+07            | 60             |
| 10  | 17,500     | 40  | 1.00E+05            | 10             |
| 11  | 17,500     | 40  | 1.00E+05            | 30             |
| 12  | 17,500     | 40  | 1.00E+05            | 60             |
| 13  | 17,500     | 40  | 1.00E+06            | 10             |
| 14  | 17,500     | 40  | 1.00E+06            | 30             |
| 15  | 17,500     | 40  | 1.00E+06            | 60             |
| 16  | 17,500     | 40  | 1.00E+07            | 10             |
| 17  | 17,500     | 40  | 1.00E+07            | 30             |
| 18  | 17,500     | 40  | 1.00E+07            | 60             |
| 19  | 17,500     | 70  | 1.00E+05            | 10             |
| 20  | 17,500     | 70  | 1.00E+05            | 30             |
| 21  | 17,500     | 70  | 1.00E+05            | 60             |
| 22  | 17,500     | 70  | 1.00E+06            | 10             |
| 23  | 17,500     | 70  | 1.00E+06            | 30             |
| 24  | 17,500     | 70  | 1.00E+06            | 60             |
| 25  | 17,500     | 70  | 1.00E+07            | 10             |
| 26  | 17,500     | 70  | 1.00E+07            | 30             |
| 27  | 17,500     | 70  | 1.00E+07            | 60             |



|    |        |    |          |    |
|----|--------|----|----------|----|
| 28 | 35,000 | 10 | 1.00E+05 | 10 |
| 29 | 35,000 | 10 | 1.00E+05 | 30 |
| 30 | 35,000 | 10 | 1.00E+05 | 60 |
| 31 | 35,000 | 10 | 1.00E+06 | 10 |
| 32 | 35,000 | 10 | 1.00E+06 | 30 |
| 33 | 35,000 | 10 | 1.00E+06 | 60 |
| 34 | 35,000 | 10 | 1.00E+07 | 10 |
| 35 | 35,000 | 10 | 1.00E+07 | 30 |
| 36 | 35,000 | 10 | 1.00E+07 | 60 |
| 37 | 35,000 | 40 | 1.00E+05 | 10 |
| 38 | 35,000 | 40 | 1.00E+05 | 30 |
| 39 | 35,000 | 40 | 1.00E+05 | 60 |
| 40 | 35,000 | 40 | 1.00E+06 | 10 |
| 41 | 35,000 | 40 | 1.00E+06 | 30 |
| 42 | 35,000 | 40 | 1.00E+06 | 60 |
| 43 | 35,000 | 40 | 1.00E+07 | 10 |
| 44 | 35,000 | 40 | 1.00E+07 | 30 |
| 45 | 35,000 | 40 | 1.00E+07 | 60 |
| 46 | 35,000 | 70 | 1.00E+05 | 10 |
| 47 | 35,000 | 70 | 1.00E+05 | 30 |
| 48 | 35,000 | 70 | 1.00E+05 | 60 |
| 49 | 35,000 | 70 | 1.00E+06 | 10 |
| 50 | 35,000 | 70 | 1.00E+06 | 30 |
| 51 | 35,000 | 70 | 1.00E+06 | 60 |
| 52 | 35,000 | 70 | 1.00E+07 | 10 |
| 53 | 35,000 | 70 | 1.00E+07 | 30 |
| 54 | 35,000 | 70 | 1.00E+07 | 60 |
| 55 | 70,000 | 10 | 1.00E+05 | 10 |
| 56 | 70,000 | 10 | 1.00E+05 | 30 |

|    |         |    |          |    |
|----|---------|----|----------|----|
| 57 | 70,000  | 10 | 1.00E+05 | 60 |
| 58 | 70,000  | 10 | 1.00E+06 | 10 |
| 59 | 70,000  | 10 | 1.00E+06 | 30 |
| 60 | 70,000  | 10 | 1.00E+06 | 60 |
| 61 | 70,000  | 10 | 1.00E+07 | 10 |
| 62 | 70,000  | 10 | 1.00E+07 | 30 |
| 63 | 70,000  | 10 | 1.00E+07 | 60 |
| 64 | 70,000  | 40 | 1.00E+05 | 10 |
| 65 | 70,000  | 40 | 1.00E+05 | 30 |
| 66 | 70,000  | 40 | 1.00E+05 | 60 |
| 67 | 70,000  | 40 | 1.00E+06 | 10 |
| 68 | 70,000  | 40 | 1.00E+06 | 30 |
| 69 | 70,000  | 40 | 1.00E+06 | 60 |
| 70 | 70,000  | 40 | 1.00E+07 | 10 |
| 71 | 70,000  | 40 | 1.00E+07 | 30 |
| 72 | 70,000  | 40 | 1.00E+07 | 60 |
| 73 | 70,000  | 70 | 1.00E+05 | 10 |
| 74 | 70,000  | 70 | 1.00E+05 | 30 |
| 75 | 70,000  | 70 | 1.00E+05 | 60 |
| 76 | 70,000  | 70 | 1.00E+06 | 10 |
| 77 | 70,000  | 70 | 1.00E+06 | 30 |
| 78 | 70,000  | 70 | 1.00E+06 | 60 |
| 79 | 70,000  | 70 | 1.00E+07 | 10 |
| 80 | 70,000  | 70 | 1.00E+07 | 30 |
| 81 | 70,000  | 70 | 1.00E+07 | 60 |
| 82 | 140,000 | 10 | 1.00E+05 | 10 |
| 83 | 140,000 | 10 | 1.00E+05 | 30 |
| 84 | 140,000 | 10 | 1.00E+05 | 60 |
| 85 | 140,000 | 10 | 1.00E+06 | 10 |

|     |         |    |          |    |
|-----|---------|----|----------|----|
| 86  | 140,000 | 10 | 1.00E+06 | 30 |
| 87  | 140,000 | 10 | 1.00E+06 | 60 |
| 88  | 140,000 | 10 | 1.00E+07 | 10 |
| 89  | 140,000 | 10 | 1.00E+07 | 30 |
| 90  | 140,000 | 10 | 1.00E+07 | 60 |
| 91  | 140,000 | 40 | 1.00E+05 | 10 |
| 92  | 140,000 | 40 | 1.00E+05 | 30 |
| 93  | 140,000 | 40 | 1.00E+05 | 60 |
| 94  | 140,000 | 40 | 1.00E+06 | 10 |
| 95  | 140,000 | 40 | 1.00E+06 | 30 |
| 96  | 140,000 | 40 | 1.00E+06 | 60 |
| 97  | 140,000 | 40 | 1.00E+07 | 10 |
| 98  | 140,000 | 40 | 1.00E+07 | 30 |
| 99  | 140,000 | 40 | 1.00E+07 | 60 |
| 100 | 140,000 | 70 | 1.00E+05 | 10 |
| 101 | 140,000 | 70 | 1.00E+05 | 30 |
| 102 | 140,000 | 70 | 1.00E+05 | 60 |
| 103 | 140,000 | 70 | 1.00E+06 | 10 |
| 104 | 140,000 | 70 | 1.00E+06 | 30 |
| 105 | 140,000 | 70 | 1.00E+06 | 60 |
| 106 | 140,000 | 70 | 1.00E+07 | 10 |
| 107 | 140,000 | 70 | 1.00E+07 | 30 |
| 108 | 140,000 | 70 | 1.00E+07 | 60 |

---

Table S2. The detailed data for radar map of liquid BRB extract analysis in Figure 2.

| Modes         | Indicators          | Resolution |        |        |         | NCE  |      |      | Intensity threshold |      |      | Exclusion time |      |      |
|---------------|---------------------|------------|--------|--------|---------|------|------|------|---------------------|------|------|----------------|------|------|
|               |                     | 17,500     | 35,000 | 70,000 | 140,000 | 10   | 40   | 70   | 10E4                | 10E5 | 10E6 | 10             | 30   | 60   |
| Positive mode | total nodes         | 3432       | 3208   | 5546   | 1157    | 6512 | 2264 | 1947 | 3763                | 3813 | 1406 | 2782           | 3383 | 3611 |
|               | identified nodes    | 112        | 121    | 223    | 74      | 252  | 112  | 58   | 149                 | 154  | 107  | 133            | 140  | 151  |
|               | nodes in networks   | 1355       | 1331   | 2360   | 490     | 2875 | 1165 | 1022 | 1583                | 1533 | 685  | 1239           | 1405 | 1490 |
|               | self-loop nodes     | 2077       | 1877   | 3186   | 667     | 3637 | 1099 | 925  | 2180                | 2280 | 721  | 1543           | 1978 | 2121 |
|               | pairs/edges         | 1878       | 1969   | 3350   | 732     | 4194 | 1901 | 1799 | 2241                | 2231 | 1119 | 1919           | 2113 | 2157 |
|               | cosine score        | 0.83       | 0.84   | 0.86   | 0.82    | 0.87 | 0.85 | 0.88 | 0.85                | 0.85 | 0.84 | 0.84           | 0.84 | 0.84 |
|               | networks            | 262        | 236    | 451    | 70      | 530  | 190  | 147  | 298                 | 269  | 112  | 191            | 233  | 268  |
|               | cluster coefficient | 0.35       | 0.26   | 0.35   | 0.26    | 0.34 | 0.36 | 0.23 | 0.26                | 0.39 | 0.34 | 0.32           | 0.31 | 0.32 |
| Negative mode | total nodes         | 3143       | 2769   | 1940   | 1165    | 5074 | 1955 | 1773 | 3822                | 2737 | 541  | 2525           | 2844 | 3015 |
|               | identified nodes    | 66         | 67     | 52     | 49      | 131  | 50   | 46   | 77                  | 76   | 31   | 70             | 75   | 73   |
|               | nodes in networks   | 1361       | 1225   | 902    | 505     | 2361 | 980  | 903  | 1716                | 1299 | 318  | 1187           | 1282 | 1360 |
|               | self-loop nodes     | 1782       | 1544   | 1038   | 660     | 2713 | 975  | 870  | 2106                | 1438 | 223  | 1338           | 1562 | 1655 |
|               | pairs/edges         | 2006       | 1687   | 1333   | 682     | 3405 | 1565 | 1732 | 2352                | 1957 | 569  | 1783           | 1838 | 1916 |
|               | cosine score        | 0.86       | 0.87   | 0.87   | 0.87    | 0.89 | 0.89 | 0.89 | 0.88                | 0.87 | 0.86 | 0.88           | 0.88 | 0.87 |
|               | networks            | 227        | 221    | 149    | 100     | 472  | 159  | 110  | 323                 | 231  | 48   | 207            | 224  | 252  |
|               | cluster coefficient | 0.38       | 0.34   | 0.24   | 0.21    | 0.20 | 0.38 | 0.37 | 0.40                | 0.36 | 0.33 | 0.16           | 0.22 | 0.49 |

Table S3. The detailed data for radar map of powder BRB extract analysis in Figure S2.

| Modes         | Indicators          | Resolution |        |        |         | NCE  |      |      | Intensity threshold |      |      | Exclusion time |      |      |
|---------------|---------------------|------------|--------|--------|---------|------|------|------|---------------------|------|------|----------------|------|------|
|               |                     | 17,500     | 35,000 | 70,000 | 140,000 | 10   | 40   | 70   | 10E4                | 10E5 | 10E6 | 10             | 30   | 60   |
| Positive mode | total nodes         | 3903       | 3031   | 2182   | 1189    | 2137 | 2154 | 1975 | 3860                | 3747 | 1796 | 2870           | 3525 | 3676 |
|               | identified nodes    | 140        | 142    | 114    | 97      | 85   | 103  | 60   | 165                 | 174  | 113  | 153            | 172  | 149  |
|               | nodes in networks   | 1569       | 1266   | 1001   | 558     | 808  | 1127 | 1042 | 1716                | 1645 | 837  | 1302           | 1547 | 1556 |
|               | self-loop nodes     | 2334       | 1765   | 1181   | 631     | 1329 | 1027 | 933  | 2144                | 2102 | 959  | 1568           | 1978 | 2120 |
|               | pairs/edges         | 2196       | 1778   | 1557   | 893     | 1046 | 1790 | 1736 | 2577                | 2355 | 1331 | 1999           | 2279 | 2136 |
|               | cosine score        | 0.85       | 0.86   | 0.86   | 0.87    | 0.85 | 0.86 | 0.89 | 0.86                | 0.86 | 0.88 | 0.87           | 0.86 | 0.86 |
|               | networks            | 297        | 246    | 178    | 94      | 173  | 195  | 168  | 314                 | 319  | 148  | 216            | 300  | 307  |
|               | cluster coefficient | 0.35       | 0.42   | 0.29   | 0.33    | 0.47 | 0.31 | 0.54 | 0.35                | 0.35 | 0.34 | 0.34           | 0.45 | 0.38 |
| Negative mode | total nodes         | 5267       | 4192   | 2800   | 900     | 2725 | 2702 | 2427 | 5223                | 4806 | 2353 | 3789           | 4566 | 4786 |
|               | identified nodes    | 73         | 88     | 65     | 35      | 31   | 67   | 33   | 83                  | 103  | 64   | 88             | 83   | 72   |
|               | nodes in networks   | 2324       | 1945   | 1346   | 437     | 1047 | 1590 | 1271 | 2281                | 2221 | 1291 | 1926           | 2115 | 2149 |
|               | self-loop nodes     | 2943       | 2247   | 1454   | 463     | 1678 | 1112 | 1156 | 2942                | 2585 | 1062 | 1863           | 2451 | 2637 |
|               | pairs/edges         | 3485       | 2945   | 2105   | 662     | 1319 | 2749 | 2385 | 3157                | 3168 | 2157 | 3129           | 3183 | 3185 |
|               | cosine score        | 0.87       | 0.88   | 0.89   | 0.86    | 0.90 | 0.89 | 0.90 | 0.88                | 0.88 | 0.90 | 0.88           | 0.88 | 0.88 |
|               | networks            | 428        | 379    | 244    | 63      | 270  | 248  | 153  | 461                 | 444  | 236  | 329            | 396  | 404  |
|               | cluster coefficient | 0.53       | 0.41   | 0.43   | 0.41    | 0.43 | 0.39 | 0.44 | 0.30                | 0.49 | 0.53 | 0.39           | 0.49 | 0.47 |

Table S4. The optimal parameters for both samples under both polarities.

| Parameters          | Positive Mode |            | Negative Mode |            |
|---------------------|---------------|------------|---------------|------------|
|                     | Liquid BRB    | Powder BRB | Liquid BRB    | Powder BRB |
| Resolution          | 70,000        | 35,000     | 17,500        | 17,500     |
| NCE                 | 10            | 70         | 10            | 40         |
| Intensity threshold | 10E5          | 10E5       | 10E4          | 10E5       |
| Exclusion time      | 60            | 30         | 60            | 60         |

## Data deposition

The mass spectra data has been deposited to MassIVE database (<https://massive.ucsd.edu/ProteoSAFe/static/massive.jsp>) with access # MSV000087069.

All GNPS molecular networking jobs can be found at the links below:

BRB\_Liquid\_pos\_resolution\_17, 500

<https://gnps.ucsd.edu/ProteoSAFe/status.jsp?task=09eb2a325c2f45c3bbcc55d1d0939227>

BRB\_Liquid\_pos\_resolution\_35, 000

<https://gnps.ucsd.edu/ProteoSAFe/status.jsp?task=b4f9c9a7e7f24a0e873c891c86af7c15>

BRB\_Liquid\_pos\_resolution\_70, 000

<https://gnps.ucsd.edu/ProteoSAFe/status.jsp?task=32f2af1dc69b4db19e065a8cff06ee4>

BRB\_Liquid\_pos\_resolution\_140, 000

<https://gnps.ucsd.edu/ProteoSAFe/status.jsp?task=2e01603972844c71b78444654feb87f>

BRB\_Liquid\_pos\_NCE\_10

<https://gnps.ucsd.edu/ProteoSAFe/status.jsp?task=85ac6971a7254fbfa0ff94c4074b8a25>

BRB\_Liquid\_pos\_NCE\_40

<https://gnps.ucsd.edu/ProteoSAFe/status.jsp?task=580b67740f6f4a938686c2eeba508b36>

BRB\_Liquid\_pos\_NCE\_70

<https://gnps.ucsd.edu/ProteoSAFe/status.jsp?task=438ceda0fc52463cae8e9703f4b78338>

BRB\_Liquid\_pos\_intensity\_10e4

<https://gnps.ucsd.edu/ProteoSAFe/status.jsp?task=928a140a34614d81b6d0317c8e8ff9b1>

BRB\_Liquid\_pos\_intensity\_10e5

<https://gnps.ucsd.edu/ProteoSAFe/status.jsp?task=f319ff2b6f9b4528871004bd59350263>

BRB\_Liquid\_pos\_intensity\_10e6

<https://gnps.ucsd.edu/ProteoSAFe/status.jsp?task=225e518b2aef42d9b8c51124c99395d6>

BRB\_Liquid\_pos\_exclusion\_10

<https://gnps.ucsd.edu/ProteoSAFe/status.jsp?task=c3b1bc752e224db5b79166cd74d2507b>

BRB\_Liquid\_pos\_exclusion\_30

<https://gnps.ucsd.edu/ProteoSAFe/status.jsp?task=a3a8dc65714440f2ba25a76d9015a868>

BRB\_Liquid\_pos\_exclusion\_60

<https://gnps.ucsd.edu/ProteoSAFe/status.jsp?task=02e5ca80d4ab429cbafb50e311dd1f6b>

BRB\_Liquid\_neg\_resolution\_17, 500

<https://gnps.ucsd.edu/ProteoSAFe/status.jsp?task=73b2f34cbcb145b9b50627d4b27f8f07>

BRB\_Liquid\_neg\_resolution\_35, 000

<https://gnps.ucsd.edu/ProteoSAFe/status.jsp?task=40a4caa9ae274c8398df2b16d47f1110>  
BRB\_Liquid\_neg\_resolution\_70,000

<https://gnps.ucsd.edu/ProteoSAFe/status.jsp?task=93f5897db76c47c4a7c0d122af90f6b9>  
BRB\_Liquid\_neg\_resolution\_140,000

<https://gnps.ucsd.edu/ProteoSAFe/status.jsp?task=a9cdc5cdd5964e1ea128eae536791ba3>  
BRB\_Liquid\_neg\_NCE\_10

<https://gnps.ucsd.edu/ProteoSAFe/status.jsp?task=24a51f26c18146fc95594b51f4c22f88>  
BRB\_Liquid\_neg\_NCE\_40

<https://gnps.ucsd.edu/ProteoSAFe/status.jsp?task=593cda348d384550b49c3e4ee10843a4>  
BRB\_Liquid\_neg\_NCE\_70

<https://gnps.ucsd.edu/ProteoSAFe/status.jsp?task=47c62915c7734b5abca9ef212f725a33>  
BRB\_Liquid\_neg\_intensity\_10e4

<https://gnps.ucsd.edu/ProteoSAFe/status.jsp?task=f6b53e0cbcef4700b222c9bf0a6b924d>  
BRB\_Liquid\_neg\_intensity\_10e5

<https://gnps.ucsd.edu/ProteoSAFe/status.jsp?task=7ffa52544ef74a68b6ff3e78d6288bcb>  
BRB\_Liquid\_neg\_intensity\_10e6

<https://gnps.ucsd.edu/ProteoSAFe/status.jsp?task=84192dd5feaf47bc8014abf5949c67a1>  
BRB\_Liquid\_neg\_exclusion\_10

<https://gnps.ucsd.edu/ProteoSAFe/status.jsp?task=0877fd0d4a4645acb094b5a71dd5d1f7>  
BRB\_Liquid\_neg\_exclusion\_30

<https://gnps.ucsd.edu/ProteoSAFe/status.jsp?task=da6b188a47ef47dfa77631e6fb16c790>  
BRB\_Liquid\_neg\_exclusion\_60

<https://gnps.ucsd.edu/ProteoSAFe/status.jsp?task=9b7950bc977048b7988c05073a396314>  
BRB\_Powder\_pos\_resolution\_17,500

<https://gnps.ucsd.edu/ProteoSAFe/status.jsp?task=5c0890b14c454edcbbb1edb7f0fe2f4b>  
BRB\_Powder\_pos\_resolution\_35,000

<https://gnps.ucsd.edu/ProteoSAFe/status.jsp?task=7dbcee880bf344a7bd386c8df3653fcb>  
BRB\_Powder\_pos\_resolution\_70,000

<https://gnps.ucsd.edu/ProteoSAFe/status.jsp?task=b594ddb054f843c6bc93205aafca536c>  
BRB\_Powder\_pos\_resolution\_140,000

<https://gnps.ucsd.edu/ProteoSAFe/status.jsp?task=241f4a05b7774cab863ff2a8d031626d>  
BRB\_Powder\_pos\_NCE\_10

<https://gnps.ucsd.edu/ProteoSAFe/status.jsp?task=d836d5a58f3f40e3bf9114f756ae8a59>



BRB\_Powder\_pos\_NCE\_40

<https://gnps.ucsd.edu/ProteoSAFe/status.jsp?task=4b509f3f114c40c9be2d781045d1ecaa>

BRB\_Powder\_pos\_NCE\_70

<https://gnps.ucsd.edu/ProteoSAFe/status.jsp?task=365e9da936eb46439ff984217eeedd57>

BRB\_Powder\_pos\_intensity\_10e4

<https://gnps.ucsd.edu/ProteoSAFe/status.jsp?task=45335fbfcbfb43e3a70e8c262ae36eec>

BRB\_Powder\_pos\_intensity\_10e5

<https://gnps.ucsd.edu/ProteoSAFe/status.jsp?task=31ab64efd7fe474cb74def93d0d53b73>

BRB\_Powder\_pos\_intensity\_10e6

<https://gnps.ucsd.edu/ProteoSAFe/status.jsp?task=bac46c42c2434a7da328fc66a91cfd0b>

BRB\_Powder\_pos\_exclusion\_10

<https://gnps.ucsd.edu/ProteoSAFe/status.jsp?task=54965c0b9e114225bf7b05b0a1be822d>

BRB\_Powder\_pos\_exclusion\_30

<https://gnps.ucsd.edu/ProteoSAFe/status.jsp?task=0a5818f92e2e41d3a91ec3b45fcbe2af>

BRB\_Powder\_pos\_exclusion\_60

<https://gnps.ucsd.edu/ProteoSAFe/status.jsp?task=a2b51e9bbd2047b8a252417493a02d91>

BRB\_Powder\_neg\_resolution\_17, 500

<https://gnps.ucsd.edu/ProteoSAFe/status.jsp?task=3098210f7e5c4f9096b55722c0a193a1>

BRB\_Powder\_neg\_resolution\_35, 000

<https://gnps.ucsd.edu/ProteoSAFe/status.jsp?task=540960e0d473451e8bd2f425df984307>

BRB\_Powder\_neg\_resolution\_70, 000

<https://gnps.ucsd.edu/ProteoSAFe/status.jsp?task=804d5d8a94194006b12e83a0cb6c440d>

BRB\_Powder\_neg\_resolution\_140, 000

<https://gnps.ucsd.edu/ProteoSAFe/status.jsp?task=f32d53a0e4cb4f5b97b06f360fcbdf34>

BRB\_Powder\_neg\_NCE\_10

<https://gnps.ucsd.edu/ProteoSAFe/status.jsp?task=8dd36491677f41b8b5443356619eace0>

BRB\_Powder\_neg\_NCE\_40

<https://gnps.ucsd.edu/ProteoSAFe/status.jsp?task=085f68f639ea4246935c871c53de499b>

BRB\_Powder\_neg\_NCE\_70

<https://gnps.ucsd.edu/ProteoSAFe/status.jsp?task=a965dddb6b394dfdb2f5c48a11e86171>

BRB\_Powder\_neg\_intensity\_10e4

<https://gnps.ucsd.edu/ProteoSAFe/status.jsp?task=48659846ce3848c383d08056116fe425>

BRB\_Powder\_neg\_intensity\_10e5

<https://gnps.ucsd.edu/ProteoSAFe/status.jsp?task=c30f0ed5951a411786eb4c4a02b10f34>  
BRB\_Powder\_neg\_intensity\_10e6  
<https://gnps.ucsd.edu/ProteoSAFe/status.jsp?task=0626421a984e41db99897c1bf988b519>  
BRB\_Powder\_neg\_exclusion\_10  
<https://gnps.ucsd.edu/ProteoSAFe/status.jsp?task=6a5da4394cc74e54b85fbaa6679e5b15>  
BRB\_Powder\_neg\_exclusion\_30  
<https://gnps.ucsd.edu/ProteoSAFe/status.jsp?task=032a43feae30421897be55401e7bab6f>  
BRB\_Powder\_neg\_exclusion\_60  
<https://gnps.ucsd.edu/ProteoSAFe/status.jsp?task=d21ed4d1252742d2b99ed74597d38ed7>  
Liquid 70, 000-10-10e5-60 / Powder 35, 000-70-10e5-30 pos  
<https://gnps.ucsd.edu/ProteoSAFe/status.jsp?task=36037e30c6ab420fa6d1c55464515626>  
Liquid 17, 500-10-10e4-60 / Powder 17, 500-40-10e5-60 neg  
<https://gnps.ucsd.edu/ProteoSAFe/status.jsp?task=b6736cce222243599949639c0811f4c9>
